# Supplementary material
Source: PubMed Central journal article supplement (PMC4573447)
Supplement: mmc1.pdf [file mmc1.pdf]

The American Journal of Human Genetics

Supplemental Data

# **Incorporating Functional Information in Tests of Excess De Novo Mutational Load**

Yu Jiang, Yujun Han, Slavé Petrovski, Kouros Owzar, David B. Goldstein, and Andrew S. Allen

## Supplemental Data

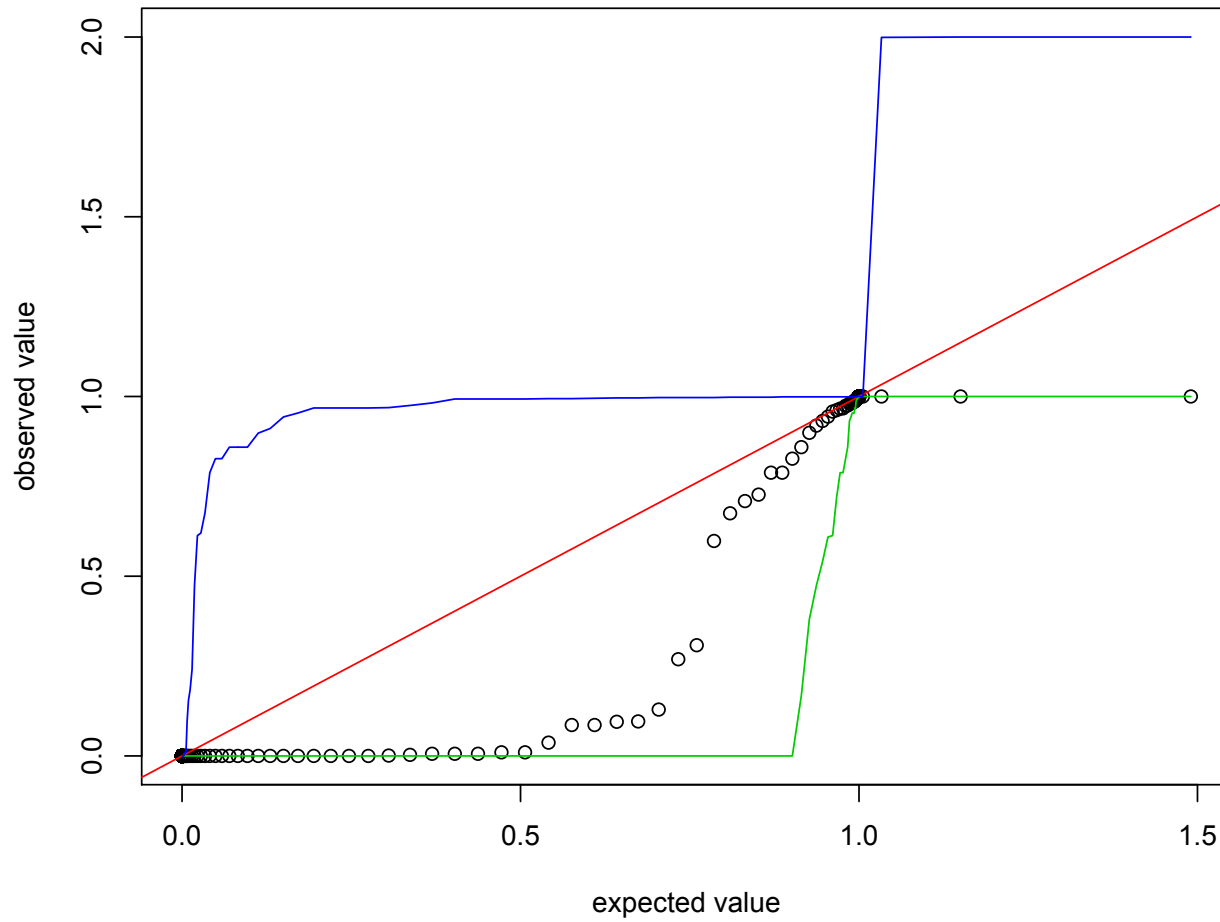

Figure S1: Expected versus observed test statistics for KIRREL3-based simulation. Sample size=150 and 10000 replicates. The blue and green lines denote 95% confidence intervals.

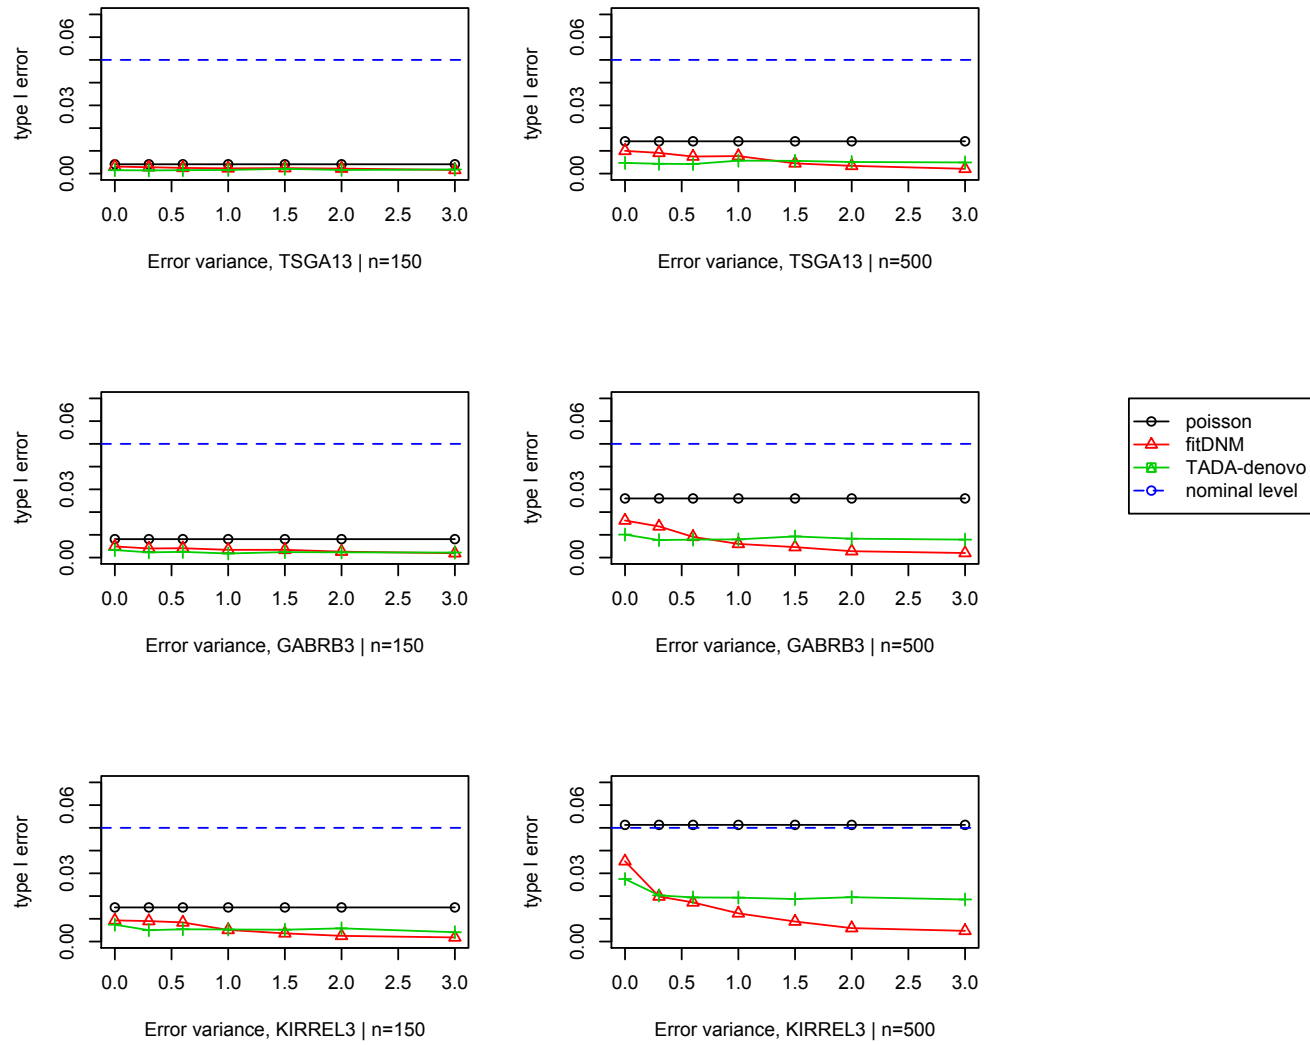

Figure S2: Type I error rates variant deleteriousness is misspecified ( $\alpha=0.05$ )

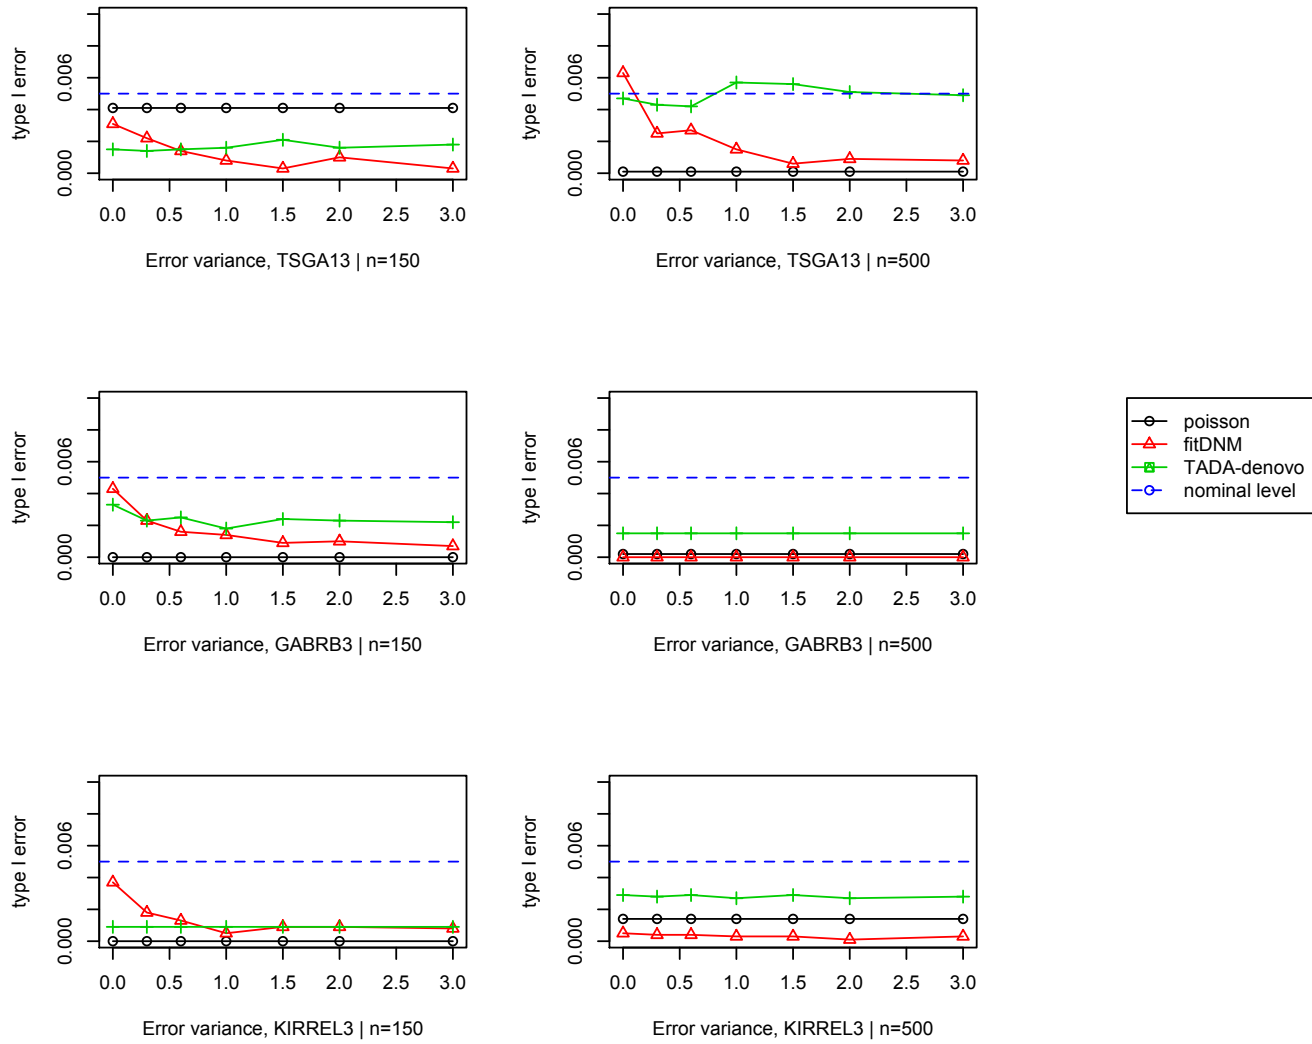

Figure S3: Type I error rates when variant deleteriousness is misspecified ( $\alpha=0.005$ )

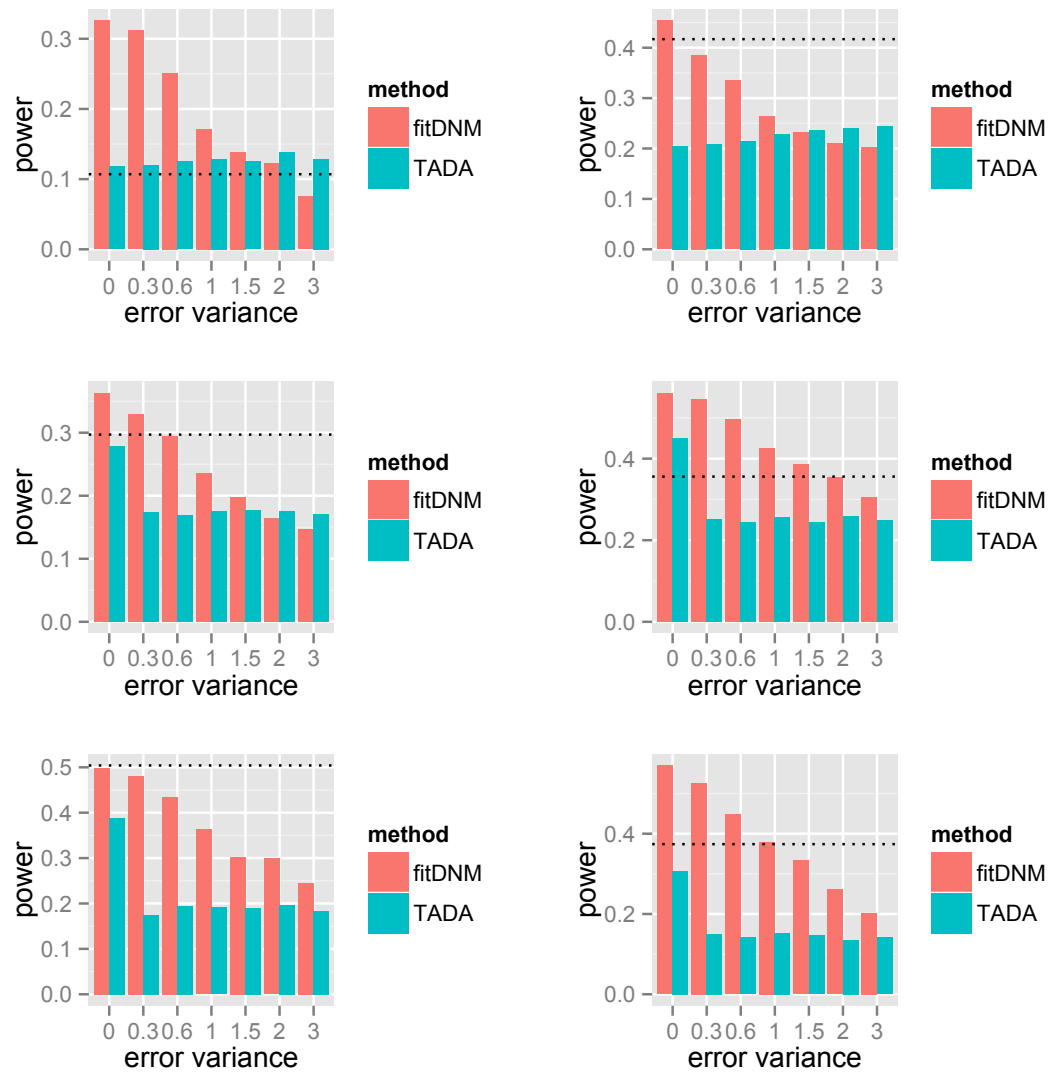

**Figure S4: Power when variant deleteriousness is misspecified.** The sample size is 150 in the left panels and 500 in the right. Simulations are based on the following genes (top to the bottom): *TSGA13*, *GABRB3*, *KIRREL3*. The dashed horizontal line is the power of Poisson test.

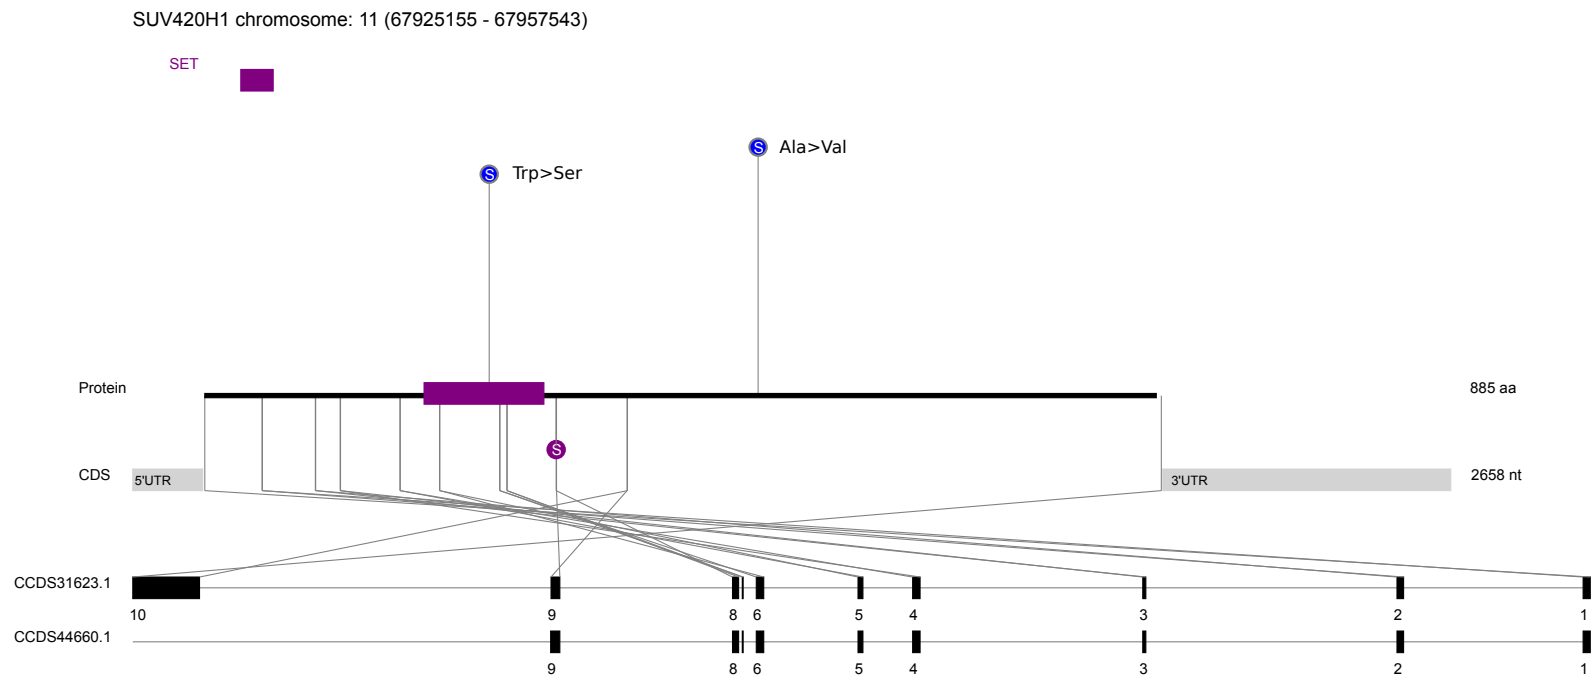

Figure S5: Location of *De novo* mutations in SUV420H1 found in ASD samples.

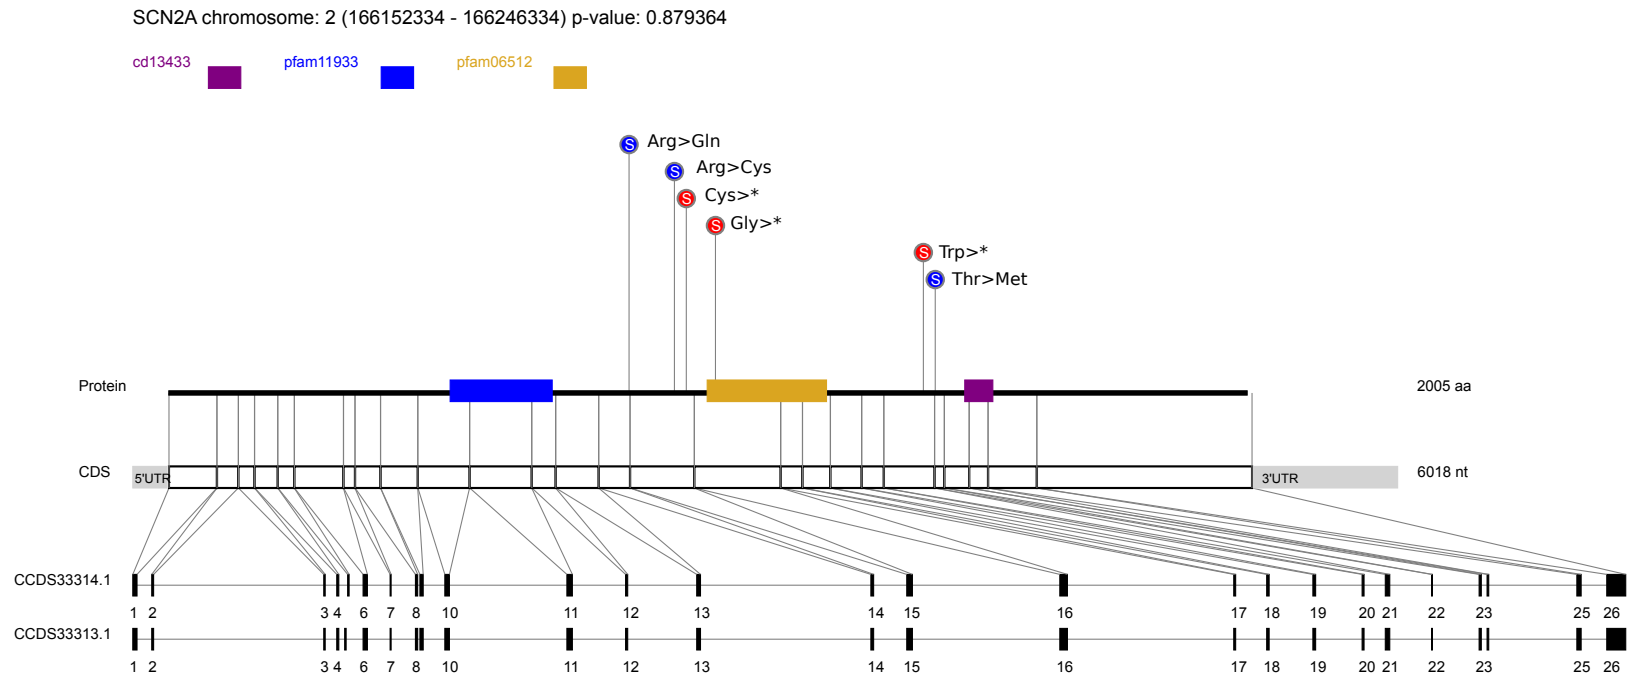

**Figure S6: Location of *De novo* mutations in *SCN2A* found in Neurodevelopmental and neuropsychiatric samples.** The first mutation (Arg>Gln) occurred twice in EE samples.

Table S1. Correlations between true PolyPhen-2 score and the misspecified Polyphen-2 scores used in analysis.

| Gene    | Simulation variance $\sigma^2$ |       |       |       |       |       |
|---------|--------------------------------|-------|-------|-------|-------|-------|
|         | 0.3                            | 0.6   | 1.0   | 1.5   | 2.0   | 3.0   |
| TSGA13  | 0.878                          | 0.698 | 0.565 | 0.462 | 0.439 | 0.391 |
| GABRB3  | 0.915                          | 0.753 | 0.604 | 0.507 | 0.444 | 0.424 |
| KIRREL3 | 0.922                          | 0.775 | 0.635 | 0.557 | 0.526 | 0.464 |



Table S2. List of *de novo* mutations in disease associated genes from combined analysis

| Gene     | RVIS    | Variant description | Affected transcript      | Affected protein                          | Disease    | Polyphen-2        |
|----------|---------|---------------------|--------------------------|-------------------------------------------|------------|-------------------|
| TRIO     | 0.15%   | chr5:g.14388774C>T  | NM_007118.2:c.3934C>T    | NM_007118.2(TRIO_i001):p.(Arg1312Trp)     | ASD        | probably damaging |
|          |         | chr5:g.14390384A>T  | NM_007118.2:c.4103A>T    | NM_007118.2(TRIO_i001):p.(Asp1368Val)     | severeID   | probably damaging |
|          |         | chr5:g.14394220A>T  | NM_007118.2:c.4292A>T    | NM_007118.2(TRIO_i001):p.(Lys1431Met)     | ASD        | probably damaging |
|          |         | chr5:g.14492731C>T  | NM_007118.2:c.7688C>T    | NM_007118.2(TRIO_i001):p.(Thr2563Met)     | severeID   | probably damaging |
|          |         | chr5:g.14508071C>T  | NM_007118.2:c.8834C>T    | NM_007118.2(TRIO_i001):p.(Thr2945Met)     | EE         | probably damaging |
| SUV420H1 | 11.22 % | chr11:g.67926275G>A | NM_017635.3:c.1538C>T    | NM_017635.3(SUV420H1_i001):p.(Ala513Val)  | ASD        | probably damaging |
|          |         | chr11:g.67938481C>T | NM_017635.3:c.977+1G>A   | Splice donor                              | ASD        |                   |
|          |         | chr11:g.67939039C>G | NM_017635.3:c.791G>C     | NM_017635.3(SUV420H1_i001):p.(Trp264Ser)  | ASD        | probably damaging |
| SCN2A    | 0.89%   | chr2:g.166198975G>A | NM_001040142.1:c.2558G>A | NM_001040142.1(SCN2A_i001):p.(Arg853Gln)  | EE (twice) | probably damaging |
|          |         | chr2:g.166201311C>T | NM_001040142.1:c.2809C>T | NM_001040142.1(SCN2A_i001):p.(Arg937Cys)  | severeID   | probably damaging |
|          |         | chr2:g.166201379C>A | NM_001040142.1:c.2877C>A | NM_001040142.1(SCN2A_i001):p.(Cys959*)    | ASD        |                   |
|          |         | chr2:g.166210819G>T | NM_001040142.1:c.3037G>T | NM_001040142.1(SCN2A_i001):p.(Gly1013*)   | ASD        |                   |
|          |         | chr2:g.166231415G>A | NM_001040142.1:c.4193G>A | NM_001040142.1(SCN2A_i001):p.(Trp1398*)   | severeID   |                   |
|          |         | chr2:g.166234111C>T | NM_001040142.1:c.4259C>T | NM_001040142.1(SCN2A_i001):p.(Thr1420Met) | ASD        | probably damaging |
| CDKL5    | 7.64%   | chrX:g.18598064C>T  | NM_001037343.1:c.379C>T  | NM_001037343.1(CDKL5_i001):p.(His127Tyr)  | EE         | probably damaging |
|          |         | chrX:g.18606157G>A  | NM_001037343.1:c.638G>A  | NM_001037343.1(CDKL5_i001):p.(Gly213Glu)  | EE         | probably damaging |
|          |         | chrX:g.18622434C>T  | NM_001037343.1:c.1390C>T | NM_001037343.1(CDKL5_i001):p.(Gln464*)    | EE         |                   |
| SCN1A    | 2.29%   | chr2:g.166848071G>A | NM_001165963.1:c.5714C>T | NM_001165963.1(SCN1A_i001):p.(Pro1905Leu) | ASD        | probably damaging |

|        |        |                         |                               |                                               |            |                      |
|--------|--------|-------------------------|-------------------------------|-----------------------------------------------|------------|----------------------|
|        |        | chr2:g.166911147C>T     | NM_001165963.1:c.602+1<br>G>A | splice donor variant                          | EE (twice) |                      |
|        |        | chr2:g.166903480G><br>A | NM_001165963.1:c.1177C<br>>T  | NM_001165963.1(SCN1A_i001):p.(Arg393<br>Cys)  | EE         | probably<br>damaging |
|        |        | chr2:g.166894356C>T     | NM_001165963.1:c.2876G<br>>A  | NM_001165963.1(SCN1A_i001):p.(Cys959<br>Tyr)  | EE         | probably<br>damaging |
|        |        | chr2:g.166870322G><br>A | NM_001165963.1:c.3637C<br>>T  | NM_001165963.1(SCN1A_i001):p.(Arg121<br>3*)   | EE         |                      |
|        |        | chr2:g.166852575G>T     | NM_001165963.1:c.4529C<br>>A  | NM_001165963.1(SCN1A_i001):p.(Ala151<br>0Glu) | EE         | probably<br>damaging |
|        |        | chr2:g.166848563C>G     | NM_001165963.1:c.5222G<br>>C  | NM_001165963.1(SCN1A_i001):p.(Cys174<br>1Ser) | EE         | probably<br>damaging |
| STXBP1 | 13.64% | chr9:g.130420659G><br>A | NM_001032221.2:c.175G<br>>A   | NM_001032221.2(STXBP1_i001):p.(Glu59<br>Lys)  | SevereID   | probably<br>damaging |
|        |        | chr9:g.130422363G>C     | NM_001032221.2:c.301G<br>>C   | NM_001032221.2(STXBP1_i001):p.(Ala101<br>Pro) | SevereID   | possibly<br>damaging |
|        |        | chr9:g.130425622C>T     | NM_001032221.2:c.568C><br>T   | NM_001032221.2(STXBP1_i001):p.(Arg19<br>0Trp) | EE         | probably<br>damaging |
|        |        | chr9:g.130428484C>T     | NM_001032221.2:c.703C><br>T   | NM_001032221.2(STXBP1_i001):p.(Arg23<br>5*)   | EE         |                      |
|        |        | chr9:g.130434370C>T     | NM_001032221.2:c.1004C<br>>T  | NM_001032221.2(STXBP1_i001):p.(Pro335<br>Leu) | EE         | probably<br>damaging |
|        |        | chr9:g.130438189G><br>A | NM_001032221.2:c.1217G<br>>A  | NM_001032221.2(STXBP1_i001):p.(Arg40<br>6His) | EE         | probably<br>damaging |
|        |        | chr9:g.130444768G><br>A | NM_001032221.2:c.1631G<br>>A  | NM_001032221.2(STXBP1_i001):p.(Gly54<br>4Asp) | EE         | probably<br>damaging |
|        |        | chr9:g.130444788C>T     | NM_001032221.2:c.1651C<br>>T  | NM_001032221.2(STXBP1_i001):p.(Arg55<br>1Cys) | ASD        | probably<br>damaging |
| GABRB3 | 17.72% | chr15:g.26806254T>C     | NM_000814.4:c.905A>G          | NM_000814.4(GABRB3_i001):p.(Tyr302Cy<br>s)    | EE         | probably<br>damaging |
|        |        | chr15:g.26828484T>C     | NM_000814.4:c.539A>G          | NM_000814.4(GABRB3_i001):p.(Glu180Gl<br>y)    | EE         | probably<br>damaging |
|        |        | chr15:g.26828534C>T     | NM_000814.4:c.489G>A          | NM_000814.4(GABRB3_i001):p.(Met163Il<br>e)    | ASD        | probably<br>damaging |
|        |        | chr15:g.26866564C>T     | NM_000814.4:c.358G>A          | NM_000814.4(GABRB3_i001):p.(Asp120A<br>sn)    | EE         | probably<br>damaging |
|        |        | chr15:g.26866594T>C     | NM_000814.4:c.328A>G          | NM_000814.4(GABRB3_i001):p.(Asn110A<br>sp)    | EE         | probably<br>damaging |

Table S3: Analysis of genes hit by more than one *de novo* mutation in controls

| Gene                         | Sample size | Gene size† | Calculated loci † | Count of de novos | fitDNM   | Poisson  | TADA   |
|------------------------------|-------------|------------|-------------------|-------------------|----------|----------|--------|
| <i>ADAMTS2</i> (MIM 604539)  | 728         | 3800       | 3697              | 2                 | 0.0345   | 0.00666  | 1      |
| <i>AGBL5</i> (MIM 615900)    | 728         | 2782       | 2782              | 2                 | 0.0277   | 0.00211  | 0.0226 |
| <i>AHNAK2</i> (MIM 103390)   | 728         | 17416      | 17416             | 2                 | 0.00605  | 0.0643   | 0.014  |
| <i>BYSL</i> (MIM 603871)     | 728         | 1342       | 1342              | 2                 | 0.0206   | 0.000659 | 1      |
| <i>EIF4G1</i> (MIM 600495)   | 728         | 4952       | 4894              | 2                 | 0.0622   | 0.00651  | 0.0451 |
| <i>FO XK2</i> (MIM 147685)   | 728         | 2019       | 1967              | 2                 | 0.000246 | 0.00227  | 0.0276 |
| <i>GLIS1</i> (MIM 610378)    | 728         | 1895       | 1895              | 2                 | 0.0119   | 0.00144  | 0.0202 |
| <i>KIF14</i> (MIM 611279)    | 728         | 5063       | 5063              | 2                 | 0.0492   | 0.00349  | 1      |
| <i>KIF4A‡</i> (MIM 300521)   | 388+340     | 3819       | 3819              | 2                 | 0.0381   | 0.00163  | 1      |
| <i>KIF4A‡</i>                | 368+360     | 3819       | 3819              | 2                 | 0.0374   | 0.00158  | 1      |
| <i>LRRK1</i> (MIM 610986)    | 728         | 6180       | 6180              | 2                 | 0.00149  | 0.0122   | 0.0026 |
| <i>MUC16*</i> (MIM 606154)   | 728         | 43860      | 15106             | 0                 | 1        | 1        | 1      |
| <i>RGS7</i> (MIM 602617)     | 728         | 1611       | 1611              | 2                 | 0.0188   | 0.000561 | 1      |
| <i>SNRNP200</i> (MIM 601664) | 728         | 6591       | 6591              | 2                 | 0.0879   | 0.0106   | 1      |
| <i>SYNE2</i> (MIM 608442)    | 728         | 21229      | 21229             | 2                 | 0.00662  | 0.0565   | 0.0097 |
| <i>TDRD5</i> (MIM 614593)    | 728         | 3176       | 3176              | 2                 | 0.0412   | 0.00166  | 1      |
| <i>TTN*</i> (MIM 188840)     | 728         | 115883     | 45104             | 1                 | 0.113    | 0.569    | 0.2782 |
| <i>UGT2B4</i> (MIM 600067)   | 728         | 1611       | 1611              | 2                 | 0.000145 | 0.000386 | 0.0110 |
| <i>USP34</i> (MIM 615295)    | 728         | 10961      | 10961             | 2                 | 0.00631  | 0.0168   | 0.0758 |

Note: † gene size: size of all exomes (plus splice sites)

† Calculated loci: removed loci with missense mutations which are not annotated by PolyPhen-2.

‡ Gene located in chromosome X, computed twice, assuming all 20 unknown gender samples are females or males.

\* Contain 2 de novo mutations inside transcripts, but some de novo mutations fall into regions not annotated by PolyPhen-2
